# Supplementary material for: Segregation Behavior of Polysaccharide–Polysaccharide Mixtures—A Feasibility Study
Source: MDPI journal article supplement (doi:10.3390/gels5020026), 2019-05-13
Supplement: s1 [file s1]

# Segregation Behavior of Polysaccharide– Polysaccharide Mixtures—A Feasibility Study

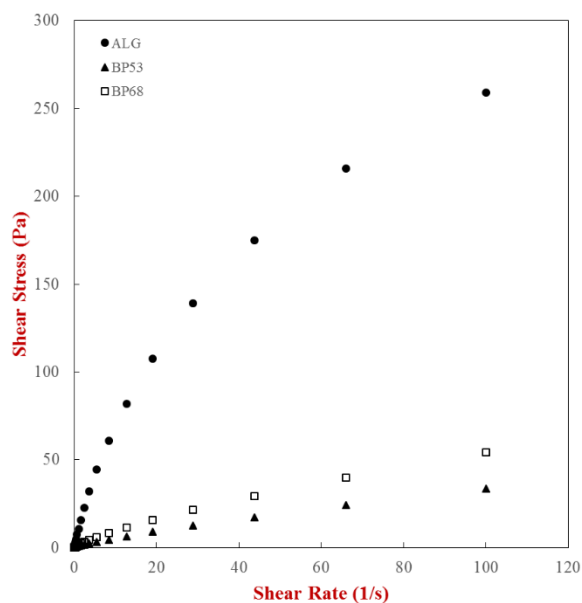

**Figure S1.** Shear thinning behavior of single biopolymer solutions ( $C_{\text{biopolymer}} = 4\%$ ): Alginate (ALG), sugar beet pectin DE 53% (BP53), and sugar beet pectin DE 68% (BP68).
